# Supplementary material for: Cohort Profile: The Karolinska Mammography Project for Risk Prediction of Breast Cancer (KARMA)
Source: PubMed Central journal article supplement — Int J Epidemiol. 2017 Feb 10;46(6):1740–1741g. doi: 10.1093/ije/dyw357 (PMC5837703; doi:10.1093/ije/dyw357), 2017-02-10
Supplement: ije-2016-01-0061-file006_dyw357.pdf [file ije-2016-01-0061-file006_dyw357.pdf]

## Supplemental information

**Supplemental Table S1.** Area based mammographic breast characteristics of the KARMA study population by level of age groups analysed through STRATUS ( $n=67,610^a$ ).

| Measure                                               | All women              | Age groups             |                        |                        |                        |                        |                        |                        |
|-------------------------------------------------------|------------------------|------------------------|------------------------|------------------------|------------------------|------------------------|------------------------|------------------------|
|                                                       |                        | Age 20-29              | Age 30-39              | Age 40-49              | Age 50-59              | Age 60-69              | Age 70-79              | Age 80-89              |
| Number participants, $n$ (%)                          |                        | 14<br>(0)              | 856<br>(1.2)           | 24,569<br>(36.3)       | 19,526<br>(28.9)       | 18,107<br>(26.8)       | 4,496<br>(6.6)         | 42<br>(0)              |
| Absolute dense area (cm <sup>2</sup> ), mean (95% CI) | 28.7<br>(28.5-28.9)    | 55.9<br>(37.2-74.8)    | 42.0<br>(40.3-43.8)    | 38.7<br>(38.4-39.1)    | 26.4<br>(26.1-26.7)    | 19.6<br>(19.3-19.8)    | 18.3<br>(17.7-18.9)    | 27.3<br>(19.2-35.5)    |
| Total breast area (cm <sup>2</sup> ), mean (95% CI)   | 152.3<br>(151.9-152.7) | 136.9<br>(101.2-172.5) | 129.6<br>(125.7-132.8) | 138.3<br>(137.6-140.0) | 153.8<br>(153.0-154.6) | 166.1<br>(165.2-166.9) | 171.2<br>(169.5-172.9) | 156.6<br>(142.5-170.7) |
| Per cent dense area (%), mean (95% CI)                | 22.6<br>(22.4-22.7)    | 45.7<br>(32.6-58.8)    | 36.8<br>(35.4-38.2)    | 32.1<br>(31.9-32.4)    | 20.2<br>(20.0-20.5)    | 14.0<br>(13.8-14.2)    | 12.6<br>(12.2-13.0)    | 18.7<br>(13.9-23.4)    |

<sup>a</sup> number of participants currently analysed by STRATUS.

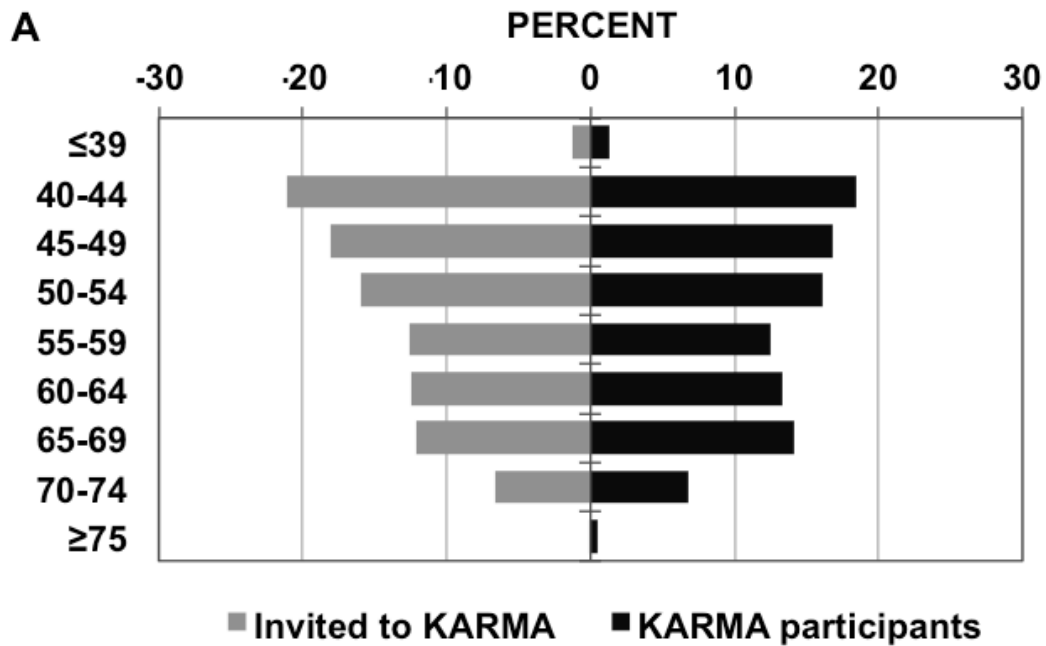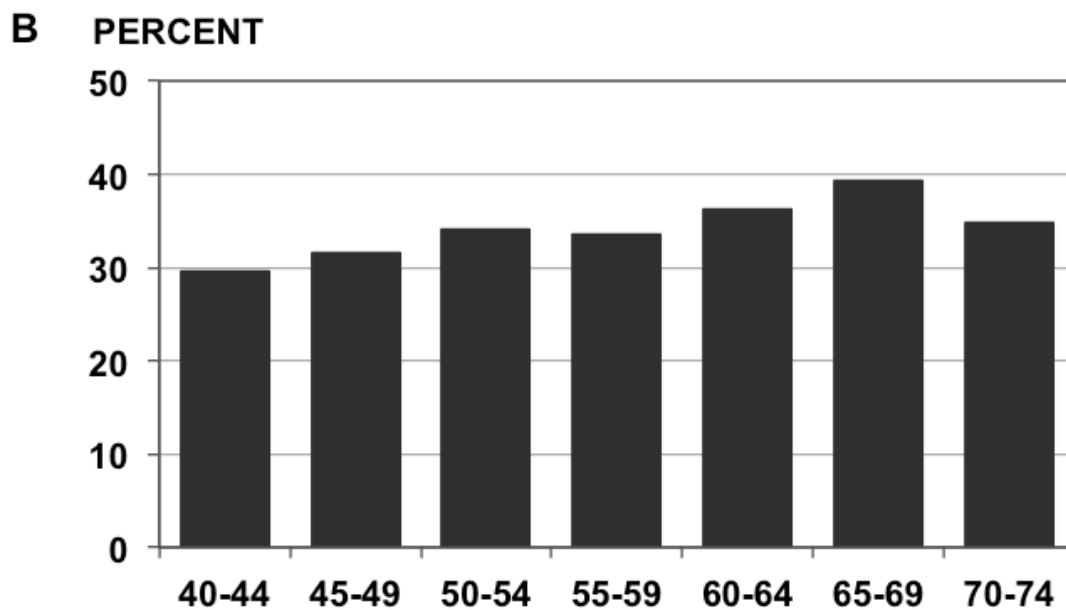

**Supplemental figure S1.** A) Distribution between age groups of all women invited ( $n=210,233$ ) and recruited ( $n=70,877$ ) to KARMA. The mean age of invited and recruited women was 53.7 (SD 9.9) years and 54.6 (SD 10.0) years, respectively. The age of the participants ranged from 21 to 95 years at study entry. B) Per cent women of all invited that accepted participation in Karma in relation to age at study entry.
